# Supplementary material for: An exploration of the genetic epidemiology of non-suicidal self-harm and suicide attempt
Source: PubMed Central journal article supplement (PMC8066869; doi:10.1186/s12888-021-03216-z), 2021-04-23
Supplement: 12888_2021_3216_MOESM1_ESM.pdf [file 12888_2021_3216_MOESM1_ESM.pdf]

## Supplementary Material for *the genetic epidemiology of non-suicidal self-harm and suicide attempt*

### Supplementary methods: quality control of GWAS data in ALSPAC

The resulting raw genome-wide data were subjected to standard quality control methods. Individuals were excluded on the basis of gender mismatches; minimal or excessive heterozygosity; disproportionate levels of individual missingness (>3%) and insufficient sample replication (IBD < 0.8). Population stratification was assessed by multidimensional scaling analysis and compared with Hapmap II (release 22) European descent (CEU), Han Chinese, Japanese and Yoruba reference populations; all individuals with non-European ancestry were removed. Single nucleotide polymorphisms (SNPs) with a minor allele frequency of < 1%, a call rate of < 95% or evidence for violations of Hardy-Weinberg equilibrium ( $P < 5E-7$ ) were removed. Cryptic relatedness was measured as proportion of identity by descent (IBD > 0.1). Related subjects that passed all other quality control thresholds were retained during subsequent phasing and imputation. 9,115 subjects and 500,527 SNPs passed these quality control filters. Genotype data were imputed to the HRC panel (HRC.r1.1) using the Michigan imputation server resulting in 8,237 children with genotype data. Related individuals were excluded.

Supplementary Table 1. Genetic correlation (rG) between exposure phenotypes and non-suicidal self-harm in ALSPAC using bivariate restricted maximum likelihood analysis

| <b>Exposure phenotype</b> | <b>n</b> | <b>rG</b> | <b>SE</b> | <b>p-value</b> | <b>fdr-adjusted p-value</b> |
|---------------------------|----------|-----------|-----------|----------------|-----------------------------|
| ADHD                      | 10946    | -1.00     | 0.79      | 0.103          | 0.370                       |
| Alcohol consumption       | 7993     | -0.59     | 0.45      | 0.095          | 0.370                       |
| Anorexia                  | 10130    | 1.00      | 0.79      | 0.103          | 0.370                       |
| Anxiety                   | 11150    | 0.99      | 0.93      | 0.144          | 0.431                       |
| ASC                       | 12300    | -1.00     | 1.70      | 0.278          | 0.497                       |
| Cannabis problematic use  | 6415     | -1.00     | 137.09    | 0.497          | 0.497                       |
| Conscientiousness         | 8627     | 0.18      | 0.39      | 0.322          | 0.497                       |
| Depression                | 11248    | 1.00      | 1.80      | 0.289          | 0.497                       |
| Education                 | 8513     | 0.03      | 0.25      | 0.452          | 0.497                       |
| Extraversion              | 8817     | 0.04      | 0.13      | 0.379          | 0.497                       |
| Income                    | 7435     | 1.00      | 9.23      | 0.457          | 0.497                       |
| IQ                        | 10178    | 0.31      | 0.22      | 0.079          | 0.370                       |
| Neuroticism               | 8690     | 0.43      | 1.24      | 0.364          | 0.497                       |
| Agreeableness             | 8745     | 0.36      | 0.42      | 0.196          | 0.497                       |
| Schizophrenia             | 7250     | 0.14      | 0.48      | 0.385          | 0.497                       |
| Openness                  | 8729     | -0.44     | 0.34      | 0.098          | 0.370                       |
| Suicide attempt (age 26)  | 9245     | -0.10     | 0.54      | 0.427          | 0.497                       |

Notes: N is the total who have either exposure or outcome data e.g. N for ADHD + N for NSSH=10946. SE standard error. ADHD attention deficit/hyperactivity disorder ASC autism spectrum conditions. FDR false discovery rate

Supplementary Table 2. Post-estimation OLS coefficients by optimum prediction model

|                   | Model for NSSH | Model for SA |
|-------------------|----------------|--------------|
| ADHD              | 53.6           | 60.5         |
| Alcohol           | 1158.8         |              |
| Anorexia          |                | 28.9         |
| Anxiety           |                |              |
| ASC               | 123.9          |              |
| Cannabis          |                |              |
| Conscientiousness |                |              |
| Depression        | 1083.4         | 2865.9       |
| Education         |                |              |
| Extraversion      |                |              |
| Income            |                | -131.0       |
| IQ                | 1264.3         |              |
| Neuroticism       | 8.8            | 3.8          |
| Agreeableness     |                |              |
| Schizophrenia     |                |              |
| Openness          |                |              |
| Suicide attempt   | 116.5          |              |

Supplementary Table 3. Summary of optimal polygenic prediction model results

| Model | Lambda | Mean Squared Predication Error | SD    |
|-------|--------|--------------------------------|-------|
| NSSH  | 41.968 | 0.142                          | 0.003 |
| SA    | 40.362 | 0.083                          | 0.002 |

Supplementary Figure 1. Results of multinomial regression showing relative risk of NSSH and SA by polygenic risk for 17 related phenotypes

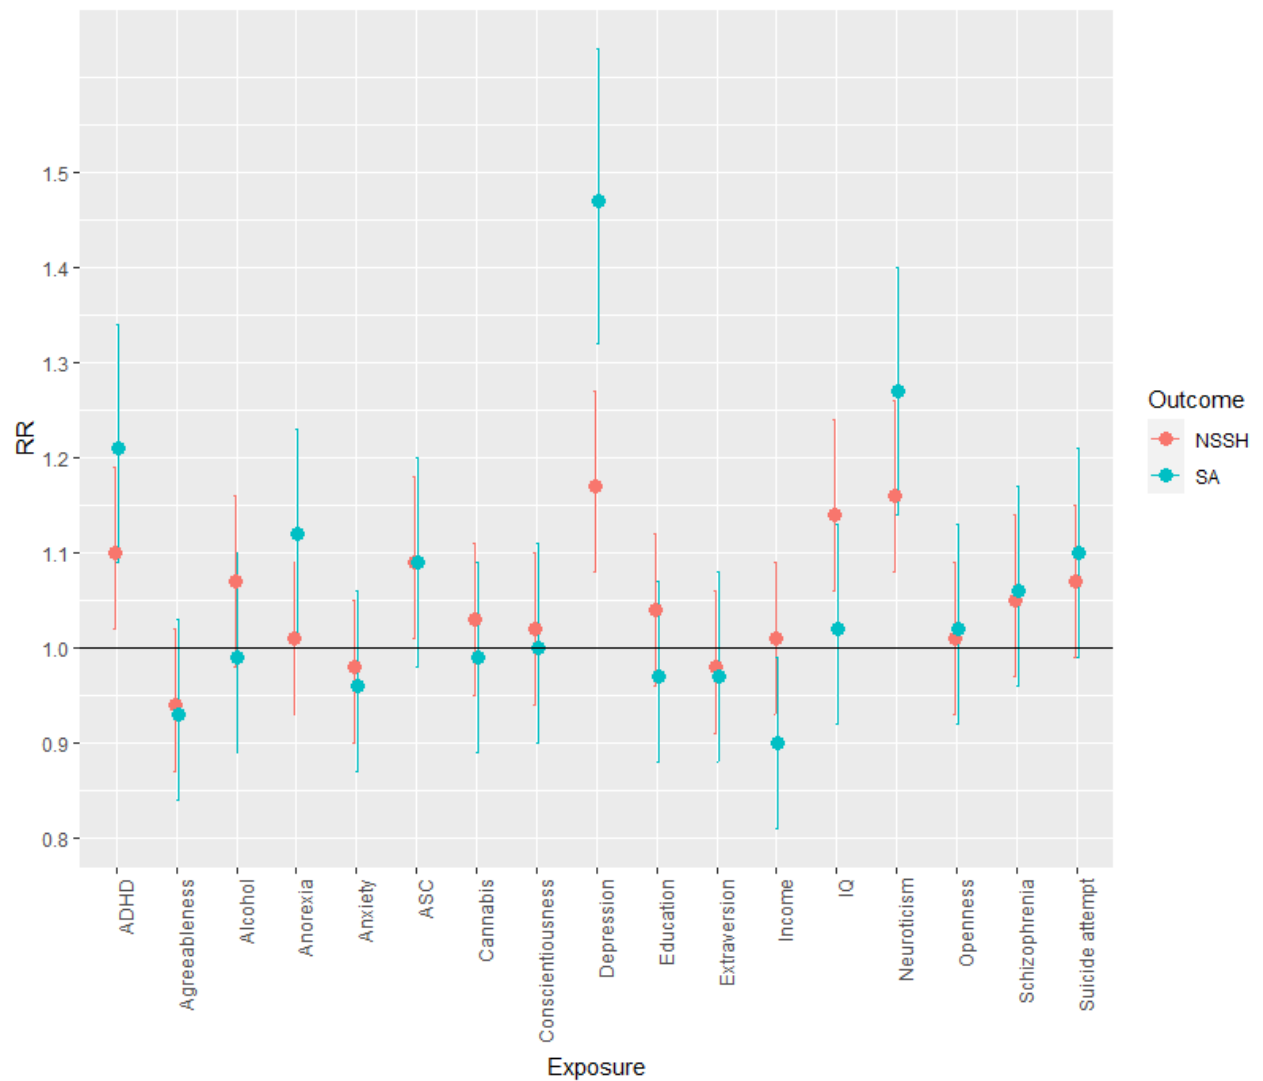

Notes: RR Relative risk; error bars show 95% confidence interval; NSSH non-suicidal self-harm; SA suicide attempt; ADHD attention deficit/hyperactivity disorder; ASC autism spectrum conditions
